# Supplementary material for: Solution-Processed Single-Component Organic Photodetectors - Strong Quadrupole Moments in Molecules Enable the State-of-the-Art Performance
Source: Research Square preprint supplement (doi:10.21203/rs.3.rs-2700964/v1), 2023-03-17
Supplement: Supplementary file 1 [file f48d80e0b194d288f8f4f333.pdf]

1 Supplementary Information

2 **Solution-Processed Single-Component Organic Photodetectors - Strong Quadrupole**  
3 **Moments in Molecules Enable the State-of-the-Art Performance**

4

5 Song Yi Park<sup>1,†</sup>, Chiara Labanti<sup>1,†</sup>, Tack Ho Lee<sup>2</sup>, Richard A. Pacalaj<sup>2</sup>, Yifan Dong<sup>2</sup>, Yi-Chun  
6 Chin<sup>1</sup>, Joel Luke<sup>1</sup>, Gihan Ryu<sup>1</sup>, Daiki Minami<sup>3</sup>, Sungyoung Yun<sup>4</sup>, Jeong-Il Park<sup>4</sup>, Feifei Fang<sup>4</sup>,  
7 and Kyung-Bae Park<sup>4</sup>, James R. Durrant<sup>2,5</sup>, and Ji-Seon Kim<sup>1,\*</sup>

8

9 <sup>1</sup>Department of Physics and Centre for Processable Electronics, Imperial College London,  
10 London SW7 2AZ, UK

11 E-mail: [ji-seon.kim@imperial.ac.uk](mailto:ji-seon.kim@imperial.ac.uk)

12

13 <sup>2</sup>Department of Chemistry and Centre for Processable Electronics, Imperial College London,  
14 White City Campus, London W12 0BZ, UK

15

16 <sup>3</sup>CSE team, Innovation Center, Samsung Electronics, Co. Ltd., 1 Samsungjeonja-ro, Hwasung-  
17 si, Gyeonggi-do 18448, Republic of Korea

18

19 <sup>4</sup>Organic Materials Lab, Samsung Advanced Institute of Technology, Samsung Electronics Co.  
20 Ltd., Samsung-ro, Yeongtong-gu, Suwon-si, Gyeonggi-do, 16678, Korea

21

22 <sup>5</sup>SPECIFIC IKC, Faculty of Science and Engineering, Swansea University, SA2 7AX, United  
23 Kingdom

24

25 <sup>†</sup>These authors contributed equally to this work.

26

## 27 **Experimental Methods**

28 **General:** IDIC, O-IDFBR, Y6 and IT-4F were purchased from Solarmer Materials.  
29 Absorbance data were obtained using a Shimadzu UV-2550 UV-vis spectrophotometer.  
30 Ambient photoemission spectroscopy (APS) was measured by an APS04 Air Photoemission  
31 system (KP Technology) using a 2 mm gold tip in ambient conditions. The same equipment  
32 was used for surface photovoltage (SPV) analysis of NFA/ZnO/ITO samples. SPV was  
33 quantified as the changes in surface potential in dark and illuminated conditions using a white  
34 bulb light source, with tunable intensity up to 1/5 Sun.

35  
36

37 **Device fabrication procedures and characterization:** OPD devices were prepared with a  
38 structure of glass/indium tin oxide (ITO)/ZnO/NFA/MoO<sub>x</sub>/Ag. Pre-patterned ITO on glass  
39 substrates were cleaned by ultra-sonication with deionized water, acetone, and 2-propanol. The  
40 substrates were then dried in an oven at 80 °C overnight. ZnO layer was prepared by sol-gel  
41 method (dissolving zinc acetate in 2-methoxyethanol with 3 vol % ethanolamine solution).  
42 After surface treatment of ITO by O<sub>2</sub> plasma ashing, ZnO solution was coated on the ITO  
43 substrates and thermally annealed at 190 °C for 20 minutes. IDIC, O-IDFBR, Y6 and IT-4F  
44 solutions were prepared in chloroform (CF) with 10 mg/mL concentration and stirred overnight  
45 at 40 °C prior to spin casting. After spin-coating the NFA layer on top of the ZnO substrates,  
46 the samples were brought into a high vacuum chamber (~10<sup>-6</sup> Torr), and MoO<sub>x</sub> (10 nm) and  
47 Ag (100 nm) was deposited sequentially by thermal evaporation. Device area was 6.0 mm<sup>2</sup>.  
48 Measurements were conducted outside the glovebox, and the devices were stored in a nitrogen  
49 filled chamber. Solar simulator was used for 1 Sun measurement which intensity was calibrated  
50 at 100 mW cm<sup>-2</sup> with a standard silicon photodiode. Light intensities were modulated using  
51 neutral density filters. Current density-voltage (*J-V*) characteristics were measured with a  
52 Keithley 2400 source measurement unit. The photocurrent transients were obtained with a  
53 DAQ card connected to a Tektronix TDS3032B Oscilloscope. External quantum efficiency  
54 (EQE) was measured using an EQE system of a tungsten halogen lamp coupled with a grating  
55 spectrometer (CS260-RG-4-MT-D). PL spectra were measured by a Renishaw inVia Raman  
56 microscope in backscattering configuration, with a 514 nm laser (Argon, Titanium Sapphire  
57 lasers). The samples were kept under nitrogen in a custom-designed chamber to reduce  
58 degradation effects. Laser spot diameter was of the order of 10 μm, 25% defocused on the  
59 sample, and diffracted light was separated by a diffraction grid (300 lines/mm). A Si reference

60 sample was used for spectrometer calibration. Optimized acquisition parameters (laser power,  
61 exposure time, measurement accumulation number) were kept consistent for the same  
62 experiments. Accuracy was improved by checking the reproducibility of spectra over multiple  
63 positions on the surface. PL was also measured on encapsulated devices applying reverse bias  
64 to the electrodes using a Keithley 2400 or Agilent voltage source. Time-correlated single  
65 photon counting (TCSPC) on thin films (on quartz) or solutions was measured in air by a  
66 photoluminescence spectrometer (FLS1000, Edinburgh Instruments), following sample  
67 excitation by lasers of different wavelengths (405 nm for O-IDTBR and 800 nm for Y6).  
68 Lifetimes are extracted by multi-exponential fitting using FAST software.

69

70 ***Transient absorption spectroscopy:*** Helios spectrometer (Spectra Physics, Newport Corp.)  
71 was used to measure the broadband pump-probe femtosecond TAS and kinetics for thin film  
72 samples. Ultrafast laser pulses (800 nm, 100 fs duration) were generated by a 1 kHz Ti:sapphire  
73 regenerative amplifier (Solstice, Spectra Physics, Newport Corp.). One portion of the 800 nm  
74 pulse was directed to an optical parametric amplifier (TOPAS Prime, Spectra-Physics) and a  
75 frequency mixer (Niruviz, Light Conversion) to tune the visible pump pulses at various  
76 wavelengths. The pump pulses were modulated at a frequency of 500 Hz by a mechanical  
77 chopper. The rest of the 800 nm pulse was routed onto a mechanical delay stage with a 6 ns  
78 time window and directed through a non-linear sapphire crystal (sapphire for the visible region  
79 and YAG for the NIR region) to generate a white light probe ranging for the visible region  
80 from 400 to 1600 nm. The probe pulse was split into two by a neutral density filter. One portion  
81 of the probe pulse served as the reference and was directly sent to the fiber-optic coupled  
82 multichannel spectrometers (CCD and InGaAs sensors). The rest of the probe pulse together  
83 with the pump pulse were focused onto the same spot on the samples with a beam size of  
84 around 0.5 mm<sup>2</sup> before sending it to the spectrometer. To compensate the fluctuations, the  
85 measured spectrum was normalized to the reference spectrum and averaged for several scans  
86 to achieve a good signal-to-noise ratio. Data analysis was performed with the commercialized  
87 Surface Explorer software.

88

89 ***Simulation:*** Optimized packing structures of face-on and edge-on were obtained by DFT  
90 calculations for 4 molecules placed in a cell with periodic boundary conditions. The DFT  
91 calculations were carried out using Vienna ab initio simulation package (VASP)<sup>1-5</sup> under the  
92 conditions of flexible cell (the shape and size of cell can be changed during the structure

93 optimization). The interface morphology between face-on and edge-on packings was generated  
94 from the crystal structures<sup>6,7</sup> and the morphology was relaxed through energy minimization  
95 with the molecular dynamics (MD) force field using Desmond package (Schrödinger, LLC,  
96 NY, USA)<sup>8</sup>. Here, we employed optimized potentials for liquid simulations (OPLS) as the force  
97 field which is widely used for MD simulation of organic molecules. The dimer structures  
98 extracted from the face-on packing structures and the interface between face-on and edge-on  
99 packings which was obtained by the DFT and MD energy minimization as explained above.  
100 The electronic excited state ( $S_1 - S_4$ ) of the dimer structures were calculated by time-dependent  
101 DFT (TD-DFT) using Jaguar package (Schrödinger, LLC, NY, USA)<sup>9</sup> with basis sets of  
102 b3lyp/6-31G\*\*.

103

104

105

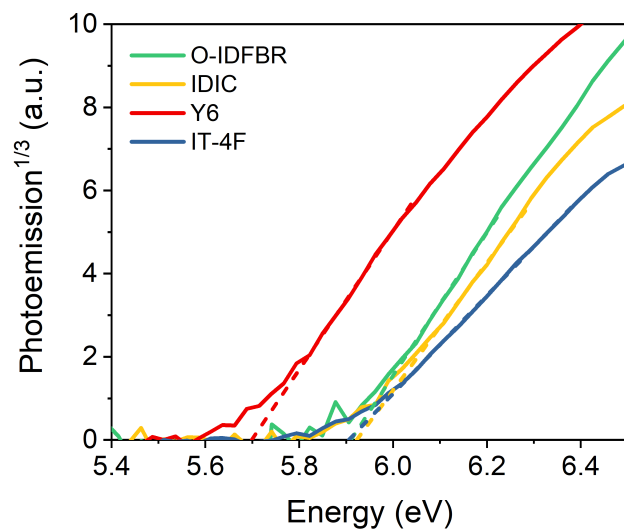

106

107 **Supplementary Figure 1.** Ambient photoemission spectra to determine HOMO level of NFA  
108 neat films. Measured HOMO levels are -5.92, -5.91, -5.91, -5.70, and -5.91 eV for O-IDFBR,  
109 IDIC, Y6, and IT-4F films, respectively.

110

111

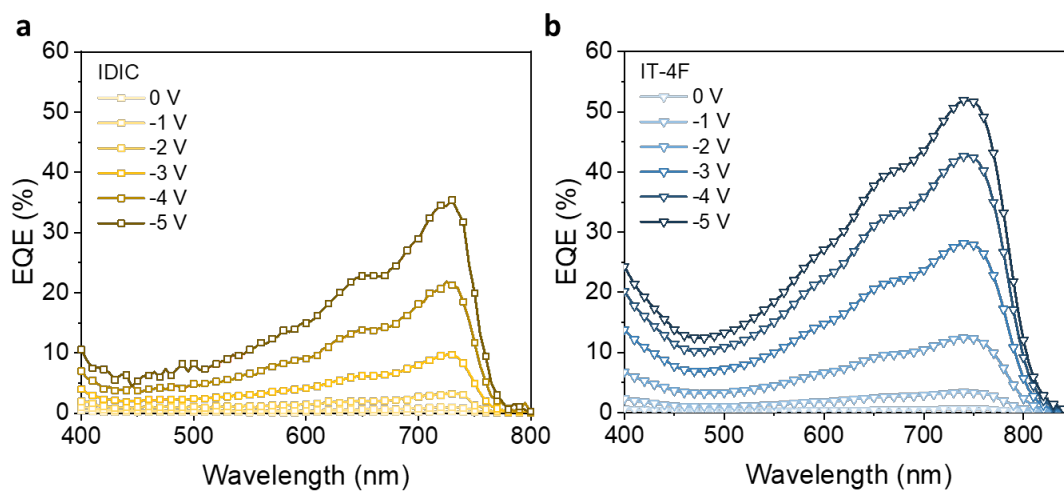

112

113 **Supplementary Figure 2.** Bias external quantum efficiency (EQE) spectra for **a**, IDIC and **b**,  
114 IT-4F OPDs.

115

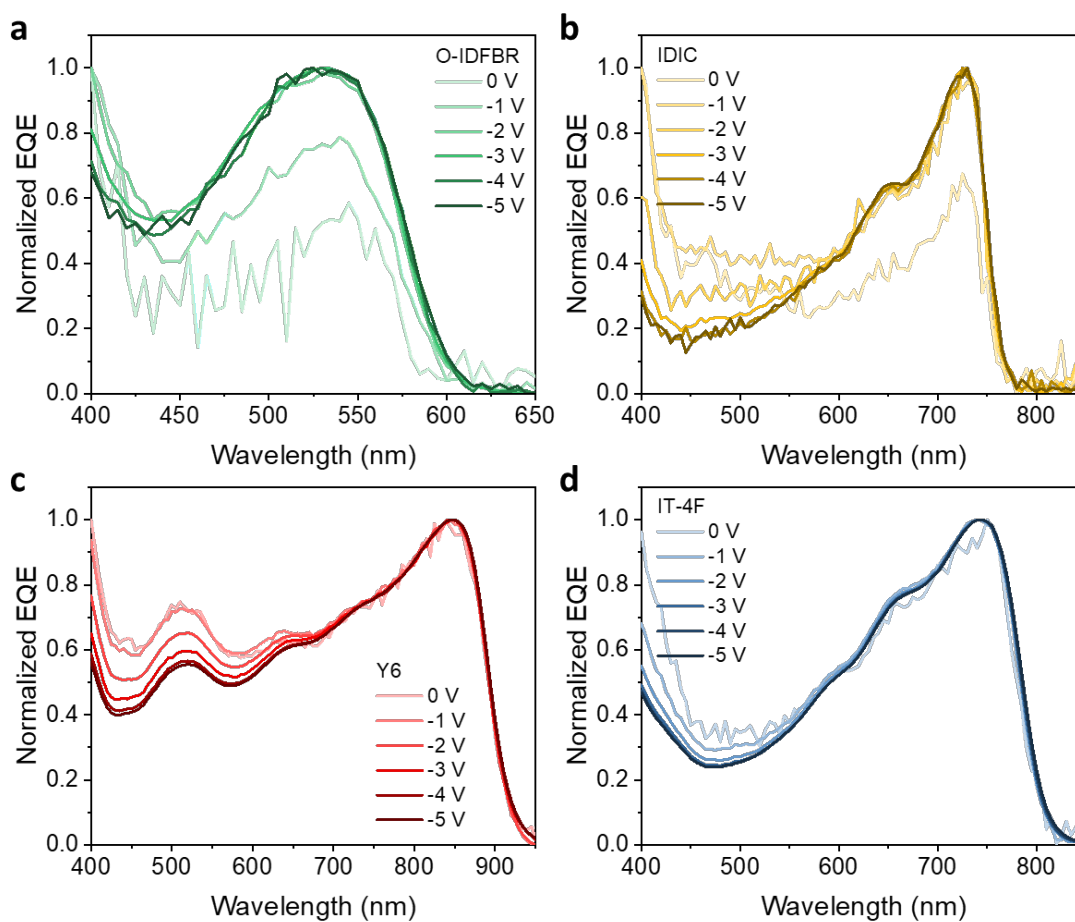

117

118 **Supplementary Figure 3.** Normalized EQE spectra of **a**, O-IDFBR, **b**, IDIC, **c**, Y6 and **d**, IT-  
119 4F OPDs with applying reverse bias from 0 to -5 V.

120

121

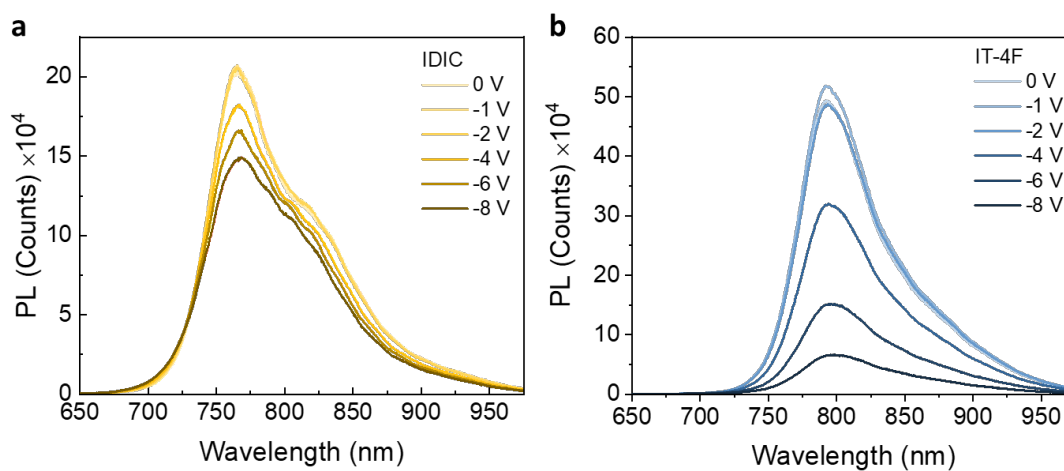

122

123 **Supplementary Figure 4.** Bias photoluminescence (PL) spectra of **a**, O-IDFBR and **b**, IT-4F  
124 OPDs.

125

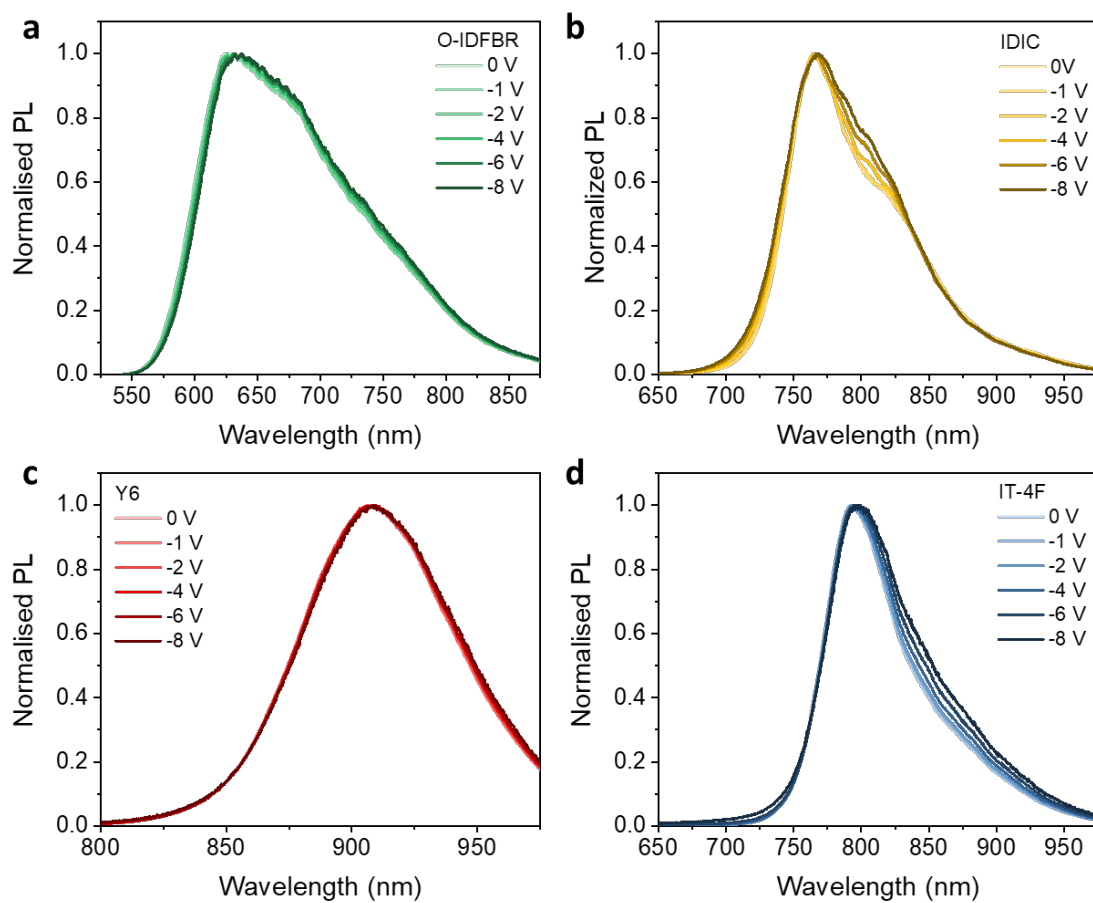

127

128 **Supplementary Figure 5.** Normalized PL spectra of **a**, O-IDFBR, **b**, IDIC, **c**, Y6 and **d**, IT-4F  
 129 OPDs with applying reverse bias from 0 to -5 V.

130

131

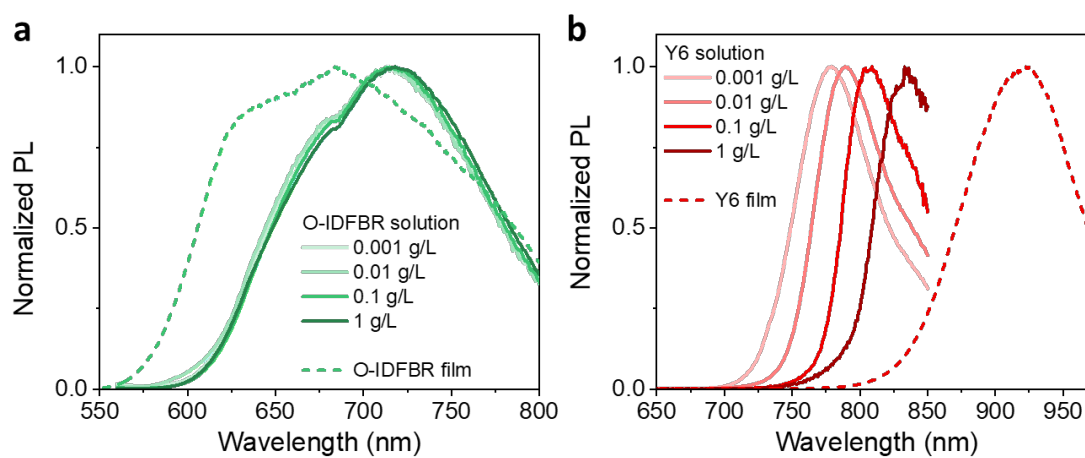

132

133 **Supplementary Figure 6.** PL spectra of **a**, O-IDFBR and **b**, Y6 in solution (indicated to the  
134 concentration) and film states.

135

136

137

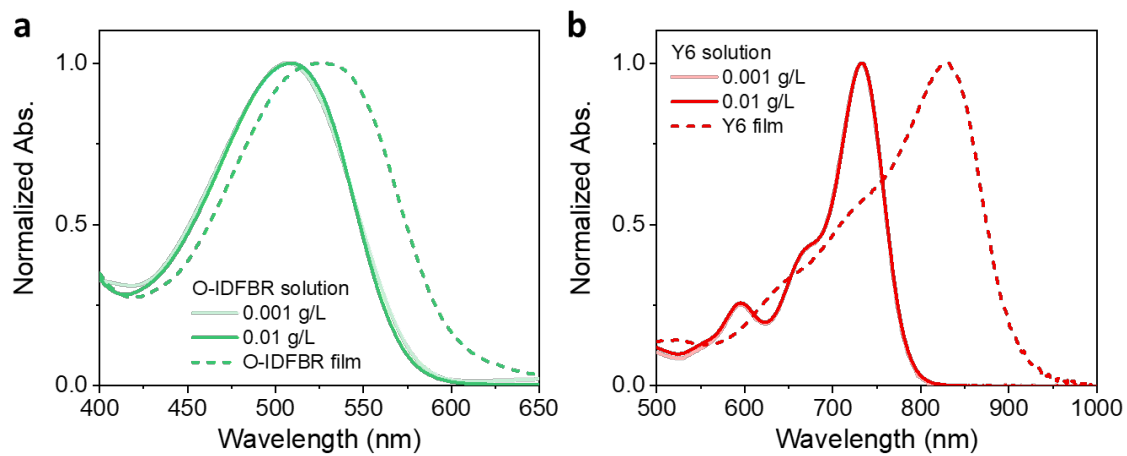

138

139 **Supplementary Figure 7.** Absorption spectra of **a**, O-IDFBR and **b**, Y6 in solution (indicated  
140 to the concentration) and film states.

141

142

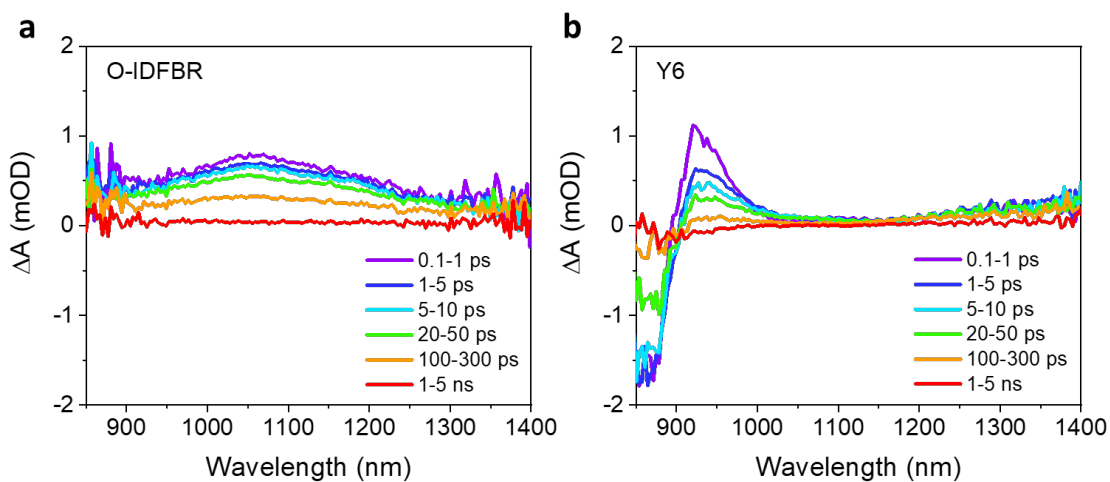

143

144 **Supplementary Figure 8. a**, Transient absorption spectra of O-IDFBR neat film with energy  
145 density of  $5 \mu\text{J cm}^{-2}$  excited at 380 nm. **b**, Transient absorption spectra of Y6 neat film with  
146 energy density of  $5 \mu\text{J cm}^{-2}$  excited at 750 nm. Probed kinetics at 1060 and 930 nm for O-  
147 IDFBR and Y6, respectively, are shown in **Fig.4**.

148

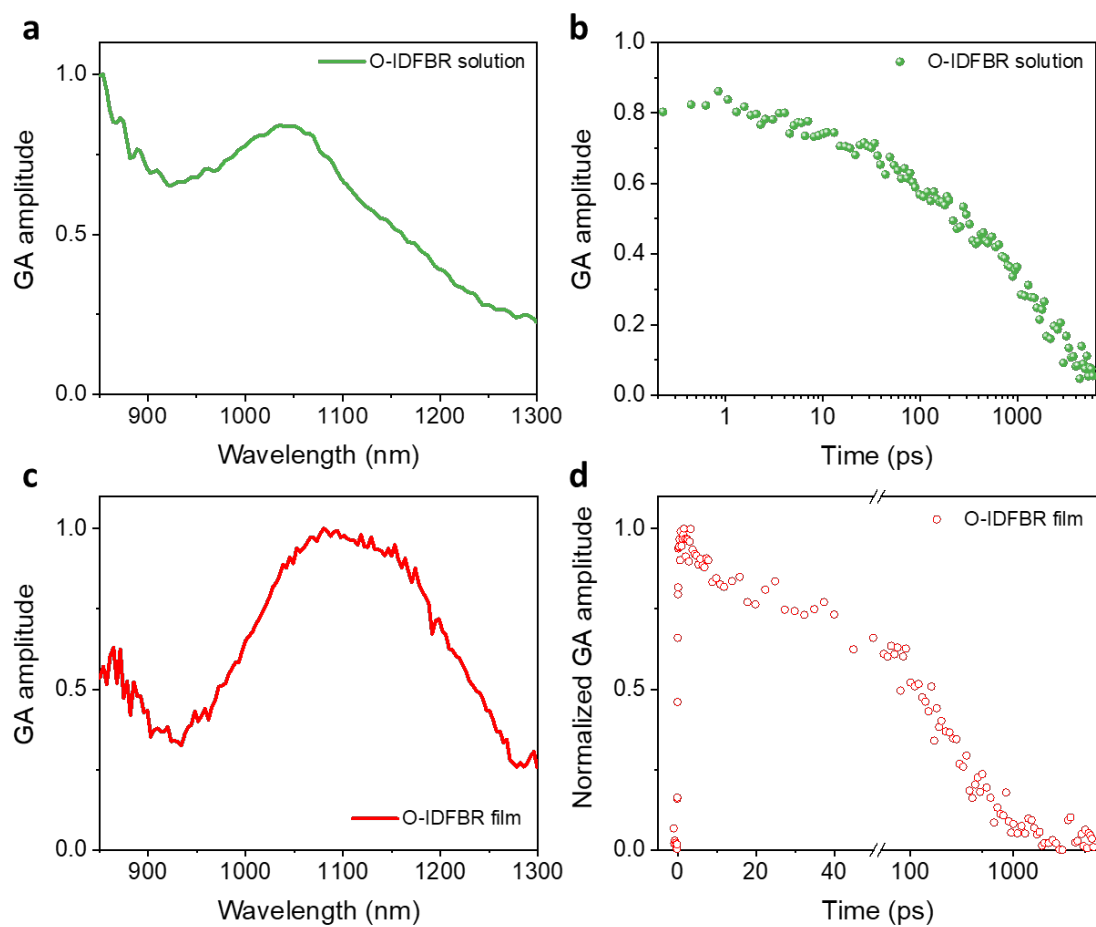

149

150 **Supplementary Figure 9.** Global analyses results for the TA data for O-IDFBR in Figure 8.  
 151 All data could be fitted to one component; inclusion of a second component in the fit did not  
 152 resolve a kinetically distinguishable species. Deconvoluted **a**, spectra and **b**, kinetics for O-  
 153 IDFBR solution. Deconvoluted **c**, spectra and **d**, kinetics for O-IDFBR film.

154

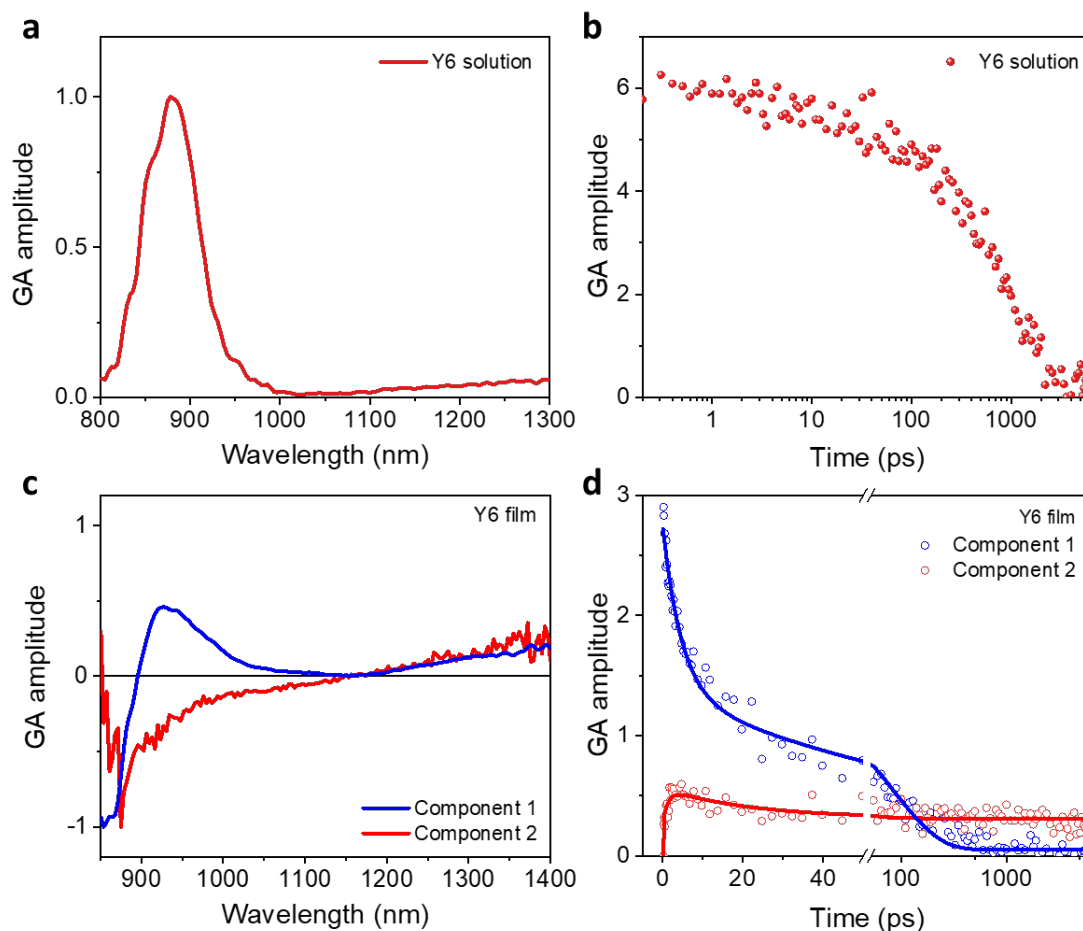

156

157 **Supplementary Figure 10.** Global analyses results for the TA data for Y6 in Figure 8. For  
 158 solution Y6, the data could be fitted to one component; inclusion of a second component in the  
 159 fit did not resolve a kinetically distinguishable species. For Y6, two components were required  
 160 to fit the data, as shown. Deconvoluted **a**, spectra and **b**, kinetics for Y6 solution. Deconvoluted  
 161 **c**, spectra and **d**, kinetics for Y6 film.

162

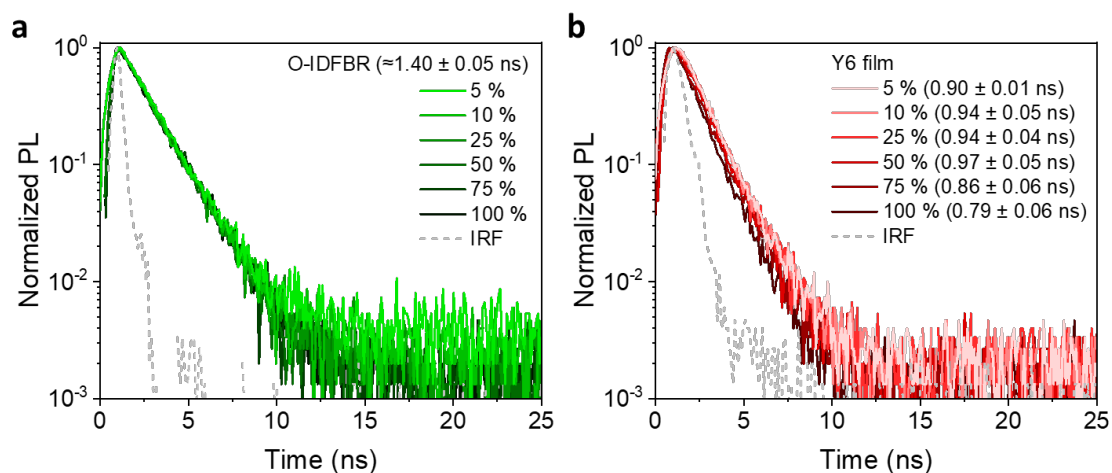

163

164 **Supplementary Figure 11.** Excitation light intensity dependent TCSPC kinetics for film of **a**,  
 165 O-IDFBR (excitation  $\lambda = 405$  nm, probe  $\lambda = 625$  nm) and **b**, Y6 (excitation  $\lambda = 800$  nm, probe  
 166  $\lambda = 900$  nm). Light intensity is indicated as percentage of maximum laser intensity (with a  
 167 photon flux of around  $10^{12}$  photons/sec).

168

169

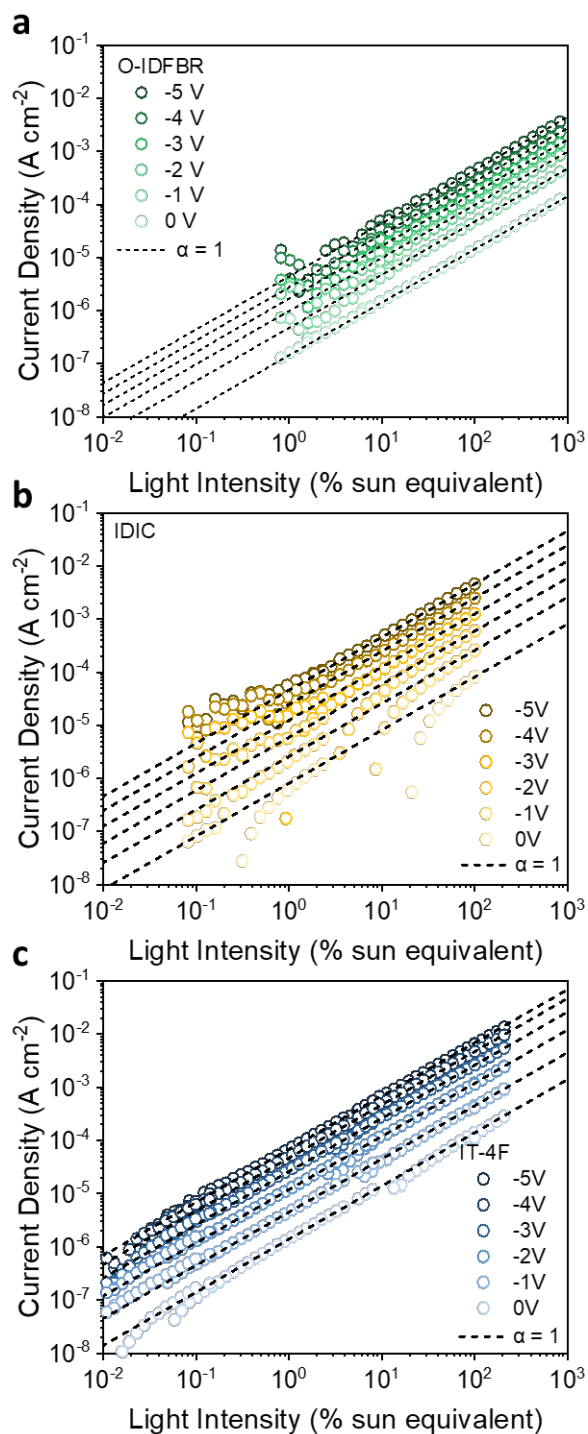

171

172 **Supplementary Figure 12.** Light intensity dependence on photocurrent density measured  
 173 under various reverse bias condition for **a**, O-IDFBR and **b**, IDIC and **c**, IT-4F OPD devices.

174

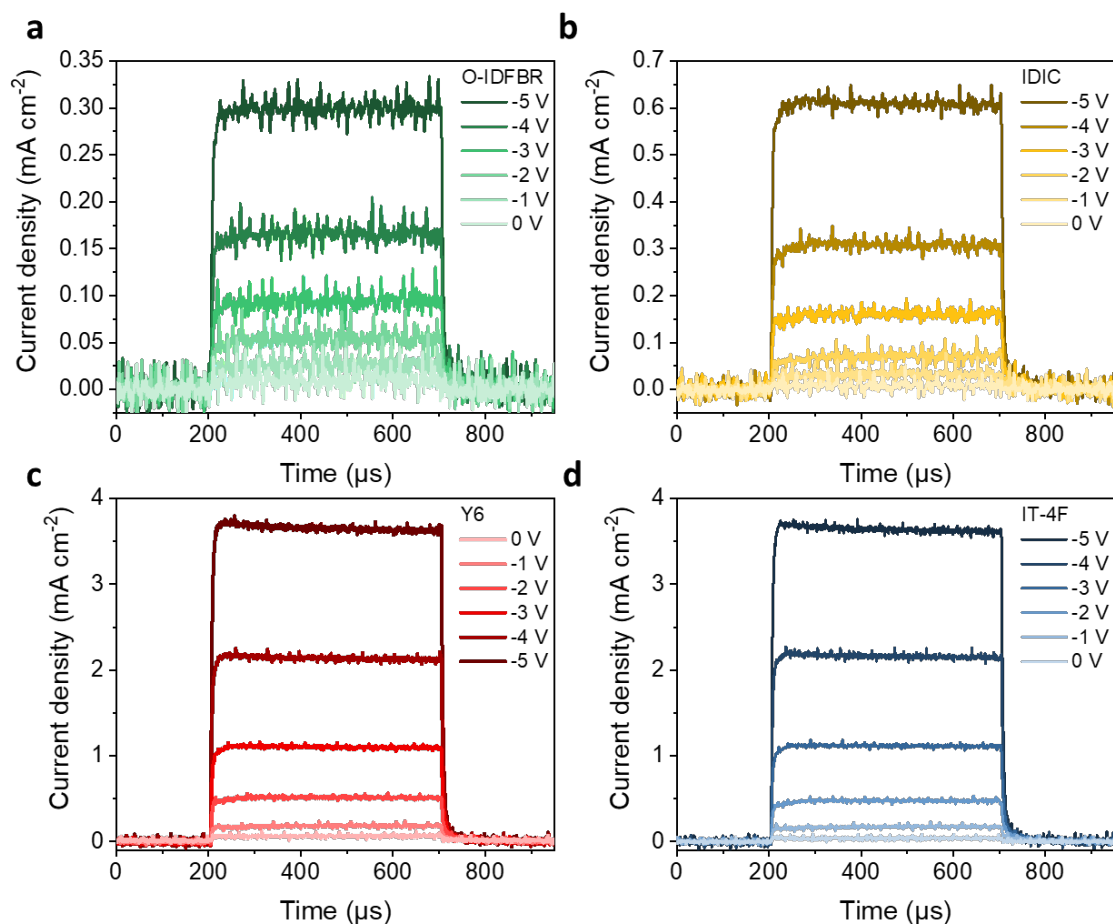

175

176 **Supplementary Figure 13.** Photocurrent transients with reverse bias from 0 to -5 V for **a**, O-  
 177 IDFBR, **b**, IDIC and **c**, IT-4F OPD devices, respectively. Similar to the bias EQE trends, the  
 178 rate of current increment is dependent on applied bias on molecule structure, with less increase  
 179 in O-IDFBR and IDIC devices (below 1 mA cm<sup>-2</sup> even at -5 V) and greater increase in Y6 and  
 180 IT-4F devices (close to 4 mA cm<sup>-2</sup> at -5 V).

181

182

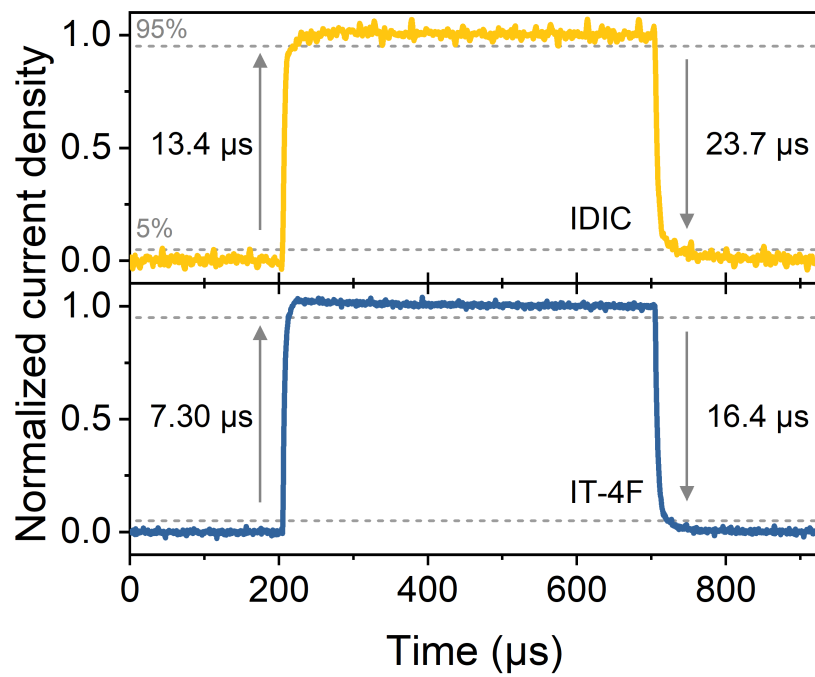

183

184 **Supplementary Fig. 14.** Normalized photocurrents of IDIC and IT-4F OPDs measured at -5  
185 V bias condition ( $f=1$  kHz). Red (633 nm) LEDs are used as an excitation light source.

186

187

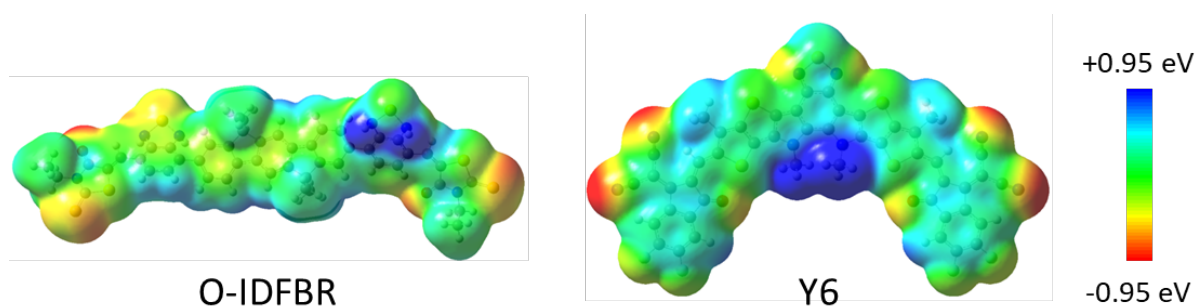

188

189 **Supplementary Figure 15. a**, Electrostatic maps of a monomer of O-IDFBR, IDIC, Y6 and  
190 IT-4F molecules. **b**, Calculated electrostatic potential (ESP) along the backbone of NFAs. It  
191 should be noted that Y6 has an additional benefit in terms of possibility of intermolecular  
192 interactions due to its five building blocks (*i.e.*, A-D-A-D-A) and its 3D-shaped structure<sup>10</sup>.  
193 Conversely, IDIC shows a relatively high ESP separation, but its linear backbone and small  
194 dimensions (only  $\approx 26.5$  Å compared to  $>30$  Å for IT-4F) limit its overlapping with neighboring  
195 molecules.

196

197

198

199

200

201

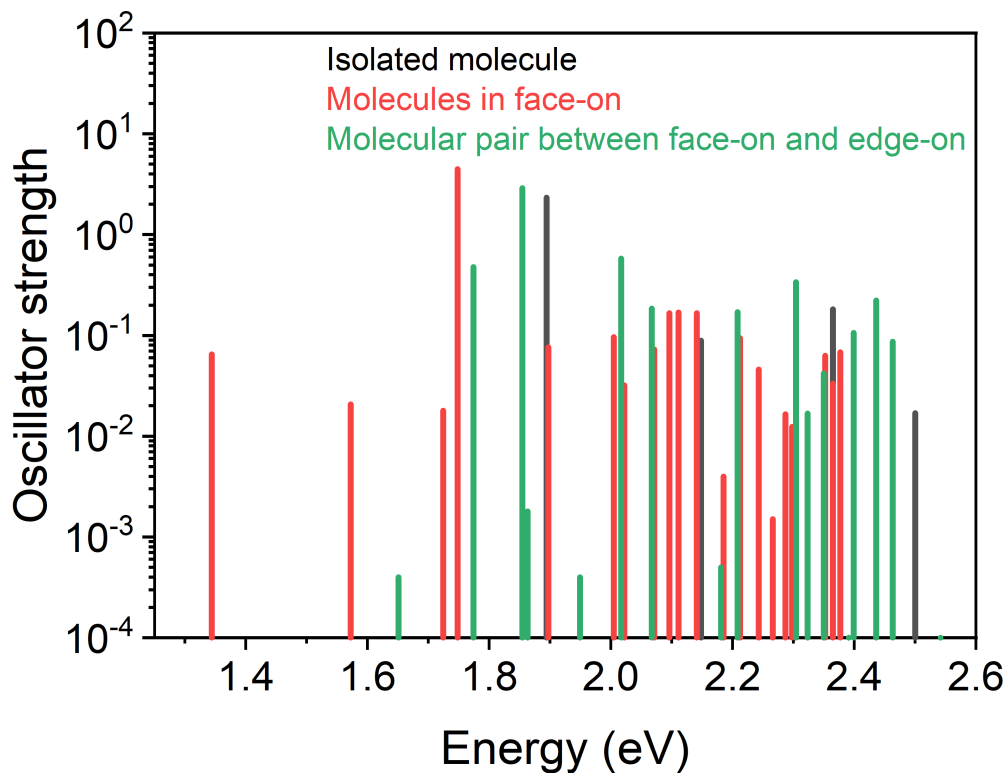

202

203 **Supplementary Figure 16.** Calculated oscillator strength of singlet excited states from  $S_1$  to  
204  $S_{20}$  for isolated molecule (black line), molecules in face-on (red line), molecules in edge-on  
205 (blue line), and molecular pair between face-on and edge-on (green line) in Y6.

206

207

208

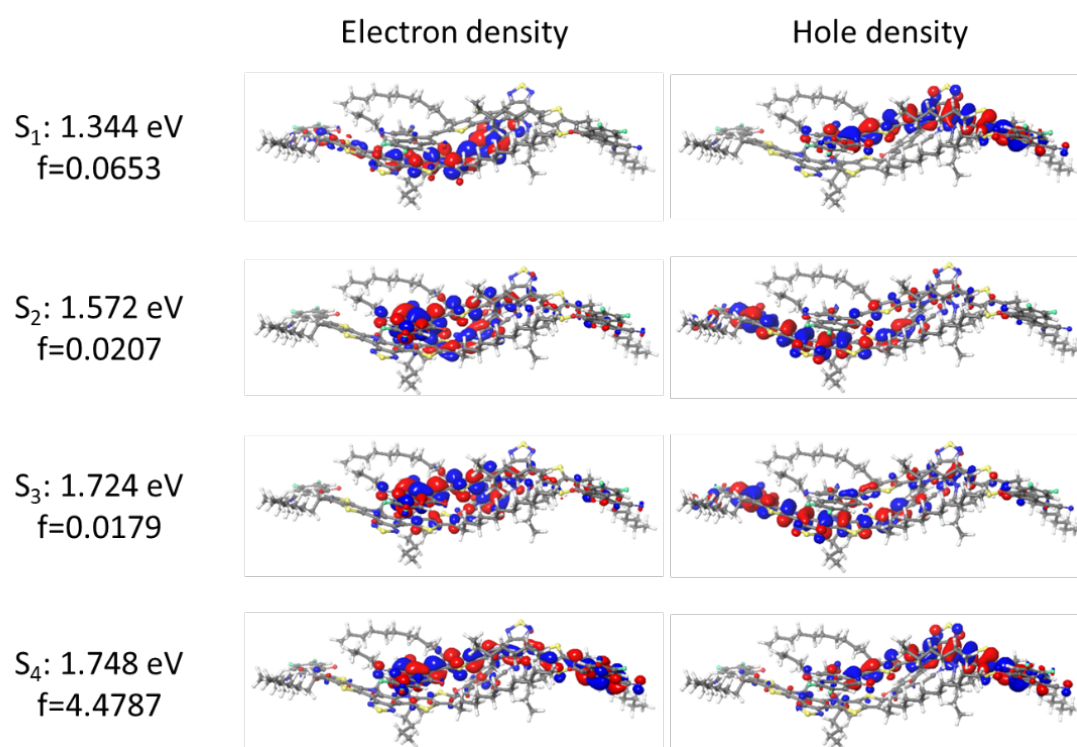

209

210 **Supplementary Figure 17.** Electron and hole density plots of 4 lowest-energy singlet excited  
211 states ( $S_1$  to  $S_4$ ) of two Y6 molecules with face-on packing.

212

213

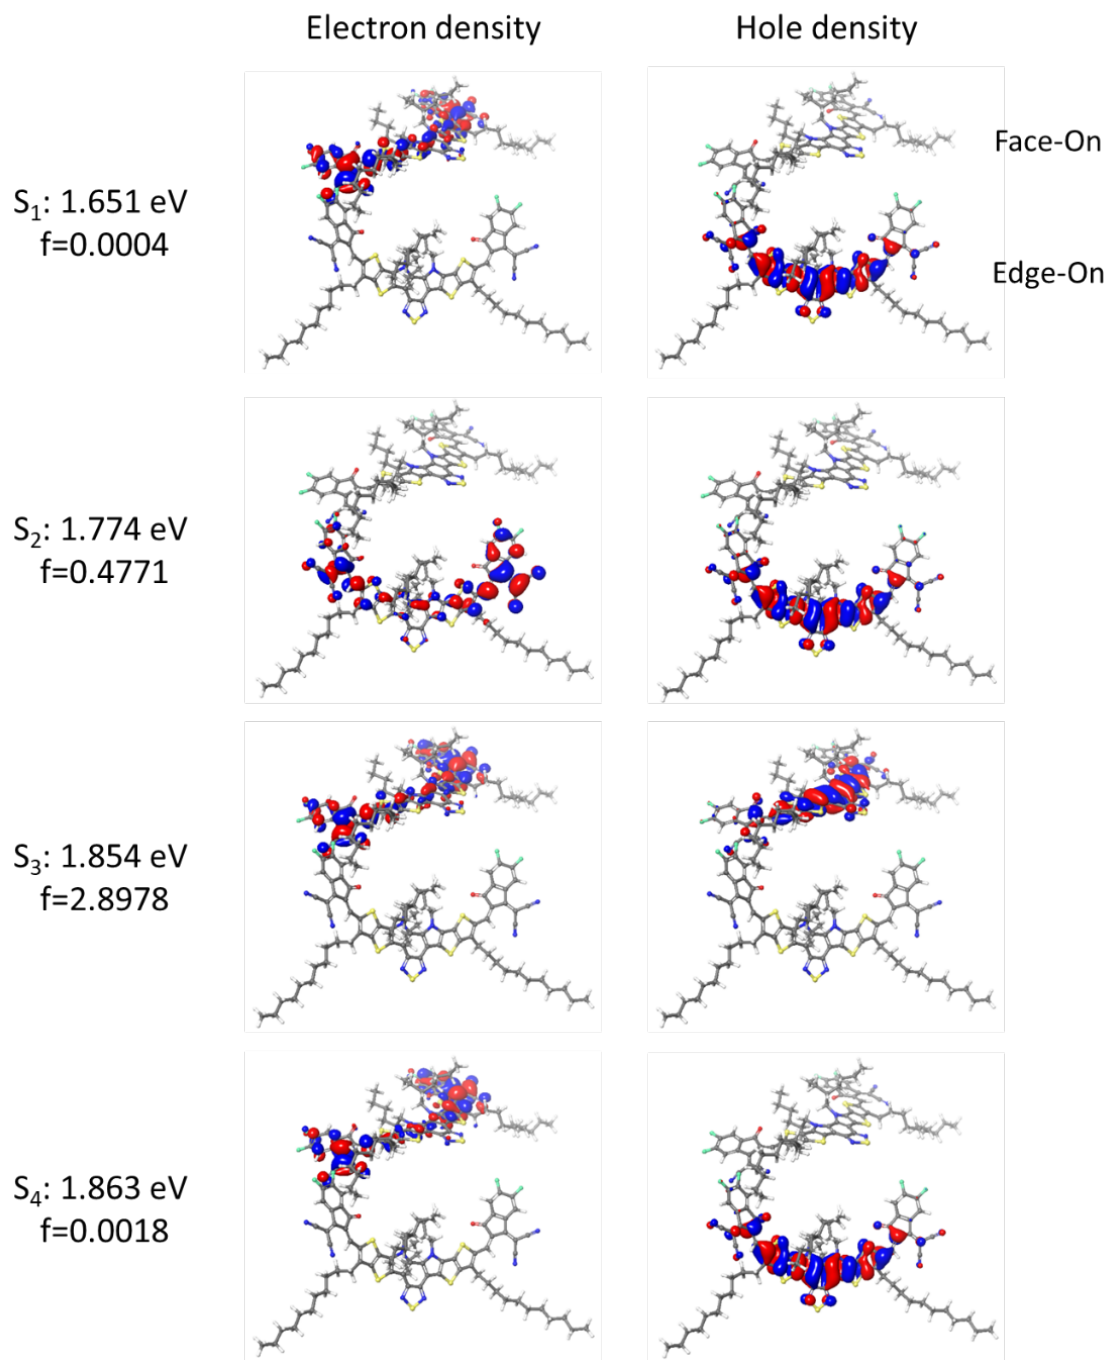

215

216 **Supplementary Figure 18.** Electron and hole density plots of 4 lowest-energy singlet excited  
217 states ( $S_1$  to  $S_4$ ) of orthogonally packed two Y6 molecules (see Supplementary Fig. 19 for  
218 details).

219

220

221

222

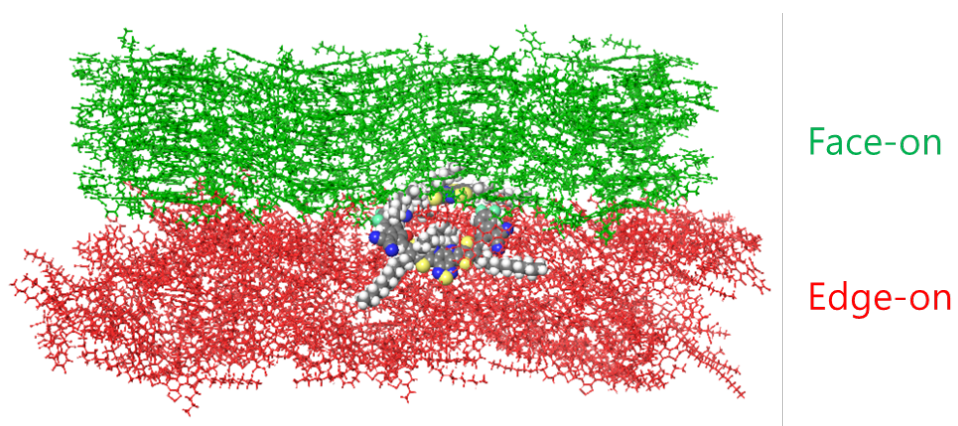

223

224 **Supplementary Figure 19.** Orthogonally packed two Y6 molecules (used in Supplementary  
225 Fig. 18) is extracted from the interface of face-on and edge-on packings.

226

227

228

229

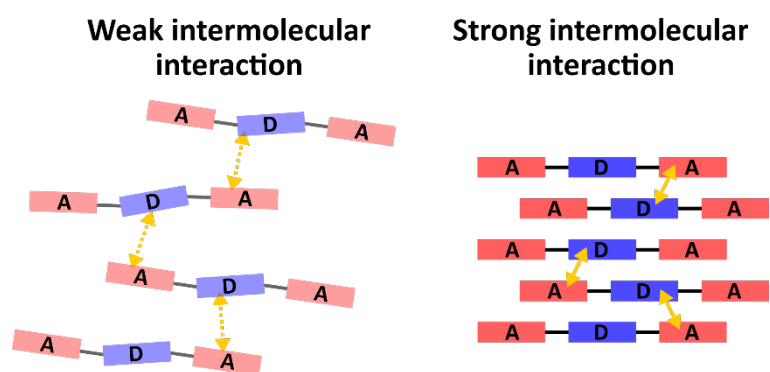

230

231 **Supplementary Figure 20.** Schematic images showing molecular packing in NFA films  
232 affected by molecular structure (twisted vs. planar) and strengths of intermolecular interaction  
233 either weak or strong.

234

235

## 236 **Experimental evidence of CTE states and free charge generation**

237 The generation of CTE states in single NFA systems is also confirmed by the surface  
238 photovoltage (SPV) measurement (**Supplementary Fig. 21**)<sup>11,12</sup>. SPV signals detected under  
239 weak light intensity illumination for IDIC and Y6 indicating existence of CTE states possibly  
240 followed by free charge generation even without applying external electric field. CTE states  
241 formed in IDIC and Y6 neat films can be separable into free charge carriers further by external  
242 electric field. Despite closely packed  $\pi$ - $\pi$  stacking in IDIC film, charge generation and  
243 extraction properties under reverse bias differ from those of Y6. This is attributed to much  
244 lower  $Q_{\pi}$  in IDIC, inducing no energetic offset between crystallites. As for O-IDFBR, due to  
245 the absence of CTE characteristics, electric field induced charge generation efficiency cannot  
246 be comparable to the other NFAs.

247 We further compare EQE spectra with 2 types of Y6 devices; mostly face-on vs. mixed  
248 (face-on & edge-on) molecular orientation of Y6. To fabricate those devices, we referred a  
249 paper which shows a facile control of molecular orientation by changing solvents – CF for  
250 mostly face-on and CB for the mixed orientations<sup>13</sup>. As expected, Y6 device with the mixed  
251 orientation exhibits higher EQE compared to that of the mostly face-on Y6 device  
252 (**Supplementary Fig. 22**). This is clear evidence of efficient CTE states followed by free  
253 charge generation, enabled by high  $Q_{\pi}$  and differently oriented crystallites in NFA films.

254

255  
256

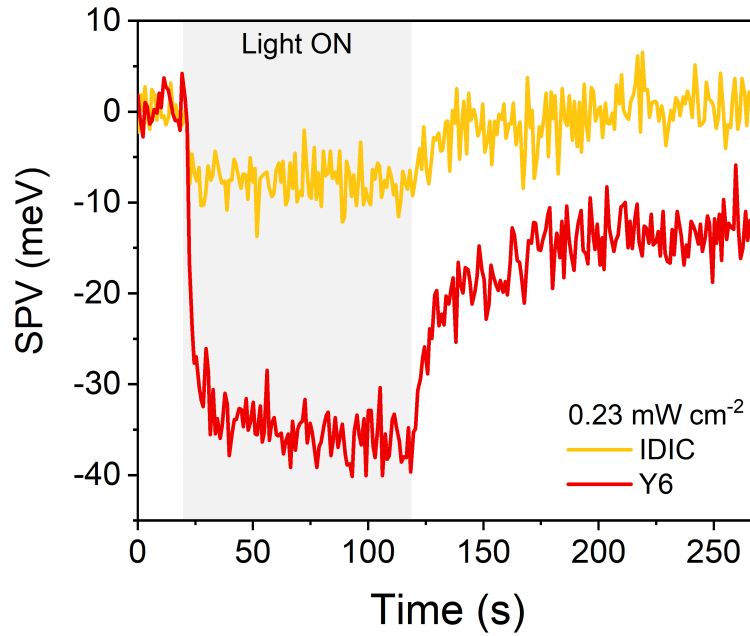

257  
258  
259  
260  
261  
262

**Supplementary Figure 21.** Surface photovoltage signal for IDIC and Y6 films under low light illumination, showing the changes in contact potential difference between light and dark conditions between a Kelvin probe and the sample surface. Sample structure is Glass/ITO/ZnO/NFAs.

263

264

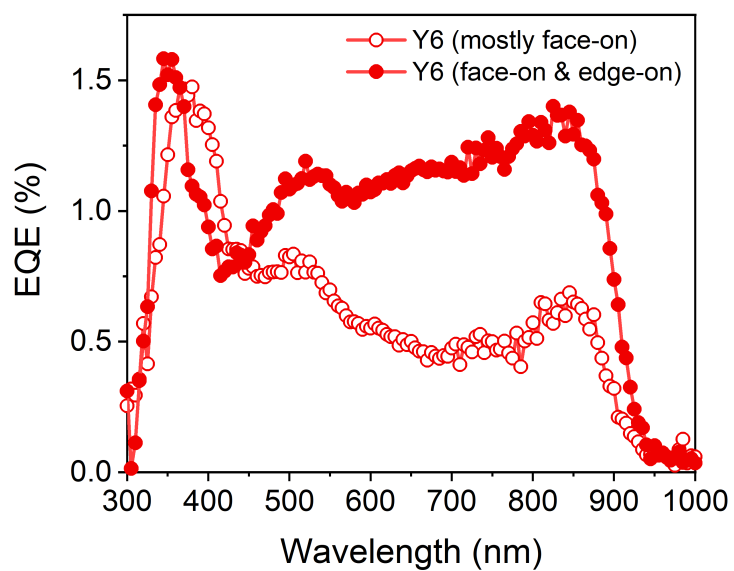

265

266 **Supplementary Figure 22.** EQE spectra of Y6 devices with different molecular orientations.

267

268 **Supplementary Table 1.** Summary of device parameters of NFA OPDs at -3 V of reverse  
 269 bias applied.

| Active layer | Thickness<br>[nm] | EQE<br>[%] | $R$<br>[A W <sup>-1</sup> ] | $J_d$<br>[A cm <sup>-2</sup> ] | $D^*$<br>[Jones]      |
|--------------|-------------------|------------|-----------------------------|--------------------------------|-----------------------|
| O-IDFBR      | 53                | 9.27       | 0.040                       | $2.69 \times 10^{-8}$          | $4.32 \times 10^{11}$ |
| IDIC         | 59                | 9.67       | 0.057                       | $1.02 \times 10^{-7}$          | $3.17 \times 10^{11}$ |
| Y6           | 53                | 22.1       | 0.151                       | $9.51 \times 10^{-9}$          | $2.74 \times 10^{12}$ |
| IT-4F        | 48                | 28.1       | 0.169                       | $9.19 \times 10^{-9}$          | $3.11 \times 10^{12}$ |

270

**Supplementary Table 2.** Summarized figure of merits of reported OPD results

| Device structure                                                                                               | $J_d$<br>(A cm <sup>-2</sup> )    | R<br>(A W <sup>-1</sup> ) | D*<br>(Jones)                     | $\tau_{rise}$<br>( $\mu$ s) | $\tau_{fall}$<br>( $\mu$ s)             | Ref. |
|----------------------------------------------------------------------------------------------------------------|-----------------------------------|---------------------------|-----------------------------------|-----------------------------|-----------------------------------------|------|
| ITO/ZnO/PTB7-Th:FO<br>IC/ MoO <sub>3</sub> /Ag                                                                 | 9×10 <sup>-6</sup><br>(-0.5 V)    | 0.45<br>(-0.1V)           | 2×10 <sup>11</sup><br>(-0.1 V)    | -                           | 0.4549<br>(under pul<br>sed laser)      | 14   |
| ITO/ZnO/PTB7-Th:CO<br>1-4Cl/MoO <sub>3</sub> /Ag                                                               | 8×10 <sup>-8</sup><br>(-2 V)      | 0.50<br>(-0.1 V)          | 3.31×10 <sup>13</sup><br>(-0.1 V) | ≥10                         | ≥10                                     | 15   |
| ITO/PEIE/ PCDTBT:P<br>C <sub>60</sub> BM/ PEDOT:PSS                                                            | 3.1×10 <sup>-10</sup><br>(-2 V)   | 0.32<br>(-2.0 V)          | 3.21×10 <sup>13</sup><br>(-2 V)   | 7.7<br>(-2 V)               | 10.9<br>(-2 V)                          | 16   |
| Ag(Au)/PEIE/ PBTBT<br>:PCBM/MoO <sub>3</sub> /Ag                                                               | 6×10 <sup>-9</sup><br>(-0.5 V)    | 0.27<br>(0 V)             | ~10 <sup>13</sup><br>(0 V)        | -                           | 0.23<br>(0 V, under<br>pulsed<br>laser) | 17   |
| ITO/ZnO/PIF:IT-4F/M<br>oO <sub>3</sub> /Ag                                                                     | 10 <sup>-7</sup><br>(-5 V)        | 0.23<br>(-8 V)            | 6.9×10 <sup>10</sup><br>(-2)      | ~1<br>(-2 V)                | -                                       | 18   |
| ITO/TiO <sub>2</sub> /poly-C <sub>60</sub> /Cy<br>7-T/MeO-TPD/MoO <sub>3</sub> /<br>Au/MoO <sub>3</sub>        | 3.3×10 <sup>-8</sup><br>(-1 V)    | 0.15<br>(-2 V)            | 3×10 <sup>12</sup><br>(-0.1 V)    |                             | ~1<br>(0 V, under<br>pulsed lase)       | 19   |
| ITO/Lys/ PBDTT-DP<br>P:PB <sub>71</sub> BM/ MoO <sub>3</sub> / Al                                              | 3.0×10 <sup>-9</sup><br>(-2 V)    | 0.12<br>(-2 V)            | 1.03×10 <sup>14</sup><br>(1 V)    | 0.289<br>(-1 V)             | 0.432<br>(-1 V)                         | 20   |
| Al/(Ca)/(C <sub>60</sub> )/p-DTS(F<br>BTTh <sub>2</sub> ) <sub>2</sub> :PC <sub>71</sub> BM/ PE<br>DOT:PSS/ITO | 1.1×10 <sup>-10</sup><br>(-0.5 V) | 0.39<br>(-0.5 V)          | 9.2×10 <sup>12</sup><br>(-0.5 V)  | -                           | -                                       | 21   |
| Al/PDPP3T:PC <sub>71</sub> BM/<br>Poly-TPD or PEDOT:<br>PSS/ITO                                                | 3.1×10 <sup>-9</sup><br>(-2 V)    | 0.21<br>(-1 V)            | 1.5×10 <sup>13</sup><br>(-0.5 V)  | 0.43<br>(-1 V)              | 0.31<br>(-1 V)                          | 22   |
| Al/C <sub>60</sub> :LiF/PTB7-Th:I<br>EICO-4F/ Poly-TPD/I<br>TO                                                 | 2.1×10 <sup>-10</sup><br>(-2 V)   | 0.45<br>(-2 V)            | 5.6×10 <sup>13</sup><br>(-2 V)    | 7.5<br>(-2 V)               | 9.2<br>(-2 V)                           | 23   |
| ITO/ ZnO/ PSBOTz:T<br>2-OEHRH/ MoO <sub>3</sub> / Ag                                                           | 7.1×10 <sup>-10</sup><br>(-2 V)   | 0.31<br>(-2 V)            | 2.04×10 <sup>13</sup><br>(-2 V)   | 30<br>(0 V)                 |                                         | 24   |
| ITO/PEDOT:PSS/PM6<br>:O4TFIC/Phen-NaDPO<br>/Ag                                                                 | 9×10 <sup>-2</sup><br>(-2 V)      | 0.5<br>(0 V)              | 9×10 <sup>11</sup><br>(0 V)       | 2.4<br>(-2 V)               | 3.7<br>(-2 V)                           | 25   |
| ITO/HTL/D18/Y6/ETL<br>/Al                                                                                      | 10 <sup>-5</sup><br>(-2 V)        | 0.5<br>(0 V)              | 1.39×10 <sup>13</sup><br>(0 V)    | 15<br>(0 V)                 | 14<br>(0 V)                             | 26   |
| Al/LiF/PNIR :ITIC/PE<br>DOT :PSS/ITO                                                                           | 6.1×10 <sup>-8</sup><br>(-0.5 V)  | 0.11<br>(-0.5 V)          | ~10 <sup>12</sup><br>(-0.5 V)     | 51.7<br>(-0.5 V)            | 148.1<br>(-0.5 V)                       | 27   |

273 **Supplementary Table 3.** Summary of photo-response time for all NFA OPDs measured under  
 274 -5 V bias condition, comparing a time required for 80% change and 90% change of  
 275 photocurrent.

| NFA     | 80% change (10%↔90%)                      |                                           | 90% change (5%↔95%)                       |                                           |
|---------|-------------------------------------------|-------------------------------------------|-------------------------------------------|-------------------------------------------|
|         | $\tau_{\text{rise}}$<br>[ $\mu\text{s}$ ] | $\tau_{\text{fall}}$<br>[ $\mu\text{s}$ ] | $\tau_{\text{rise}}$<br>[ $\mu\text{s}$ ] | $\tau_{\text{fall}}$<br>[ $\mu\text{s}$ ] |
| O-IDFBR | 11.7                                      | 10.9                                      | 14.9                                      | 26.0                                      |
| IDIC    | 5.90                                      | 13.7                                      | 13.4                                      | 23.7                                      |
| Y6      | 5.70                                      | 9.00                                      | 7.90                                      | 13.6                                      |
| IT-4F   | 5.90                                      | 9.10                                      | 7.30                                      | 16.4                                      |

276

277

278 **References**

- 279 1. Kresse, G. & Furthmüller, J. Efficiency of ab-initio total energy calculations for metals  
280 and semiconductors using a plane-wave basis set. *Comput Mater Sci* **6**, 15–50 (1996).
- 281 2. Kresse, G. & Hafner, J. Norm-conserving and ultrasoft pseudopotentials for first-row  
282 and transition elements. *Journal of Physics: Condensed Matter* **6**, 8245–8257 (1994).
- 283 3. Kresse, G. & Hafner, J. Ab. initio molecular dynamics for liquid metals. *Phys Rev B* **47**,  
284 558–561 (1993).
- 285 4. Kresse, G. & Joubert, D. From ultrasoft pseudopotentials to the projector augmented-  
286 wave method. *Phys Rev B* **59**, 1758–1775 (1999).
- 287 5. Kresse, G. & Furthmüller, J. Efficient iterative schemes for ab initio total-energy  
288 calculations using a plane-wave basis set. *Phys Rev B* **54**, 11169–11186 (1996).
- 289 6. Zhu, L. *et al.* Efficient Organic Solar Cell with 16.88% Efficiency Enabled by Refined  
290 Acceptor Crystallization and Morphology with Improved Charge Transfer and Transport  
291 Properties. *Adv Energy Mater* **10**, 1904234 (2020).
- 292 7. Zhu, W. *et al.* Crystallography, Morphology, Electronic Structure, and Transport in Non-  
293 Fullerene/Non-Indacenodithienothiophene Polymer:Y6 Solar Cells. *J Am Chem Soc* **142**,  
294 14532–14547 (2020).
- 295 8. Bowers, K. J. *et al.* Scalable Algorithms for Molecular Dynamics Simulations on  
296 Commodity Clusters. in *Proceedings of the 2006 ACM/IEEE conference on*  
297 *Supercomputing* (Institute of Electrical and Electronics Engineers (IEEE), 2006).  
298 doi:10.1109/sc.2006.54.
- 299 9. Bochevarov, A. D. *et al.* Jaguar: A high-performance quantum chemistry software  
300 program with strengths in life and materials sciences. *Int J Quantum Chem* **113**, 2110–  
301 2142 (2013).
- 302 10. Zhang, G. *et al.* Delocalization of exciton and electron wavefunction in non-fullerene  
303 acceptor molecules enables efficient organic solar cells. *Nat Commun* **11**, (2020).
- 304 11. Labanti, C. *et al.* Light-intensity-dependent photoresponse time of organic  
305 photodetectors and its molecular origin. *Nat Commun* **13**, 3745 (2022).

- 306 12. Park, S. Y., Labanti, C., Luke, J., Chin, Y. C. & Kim, J. S. Organic Bilayer Photovoltaics  
307 for Efficient Indoor Light Harvesting. *Adv Energy Mater* **12**, (2022).
- 308 13. Zhu, L. *et al.* Efficient Organic Solar Cell with 16.88% Efficiency Enabled by Refined  
309 Acceptor Crystallization and Morphology with Improved Charge Transfer and Transport  
310 Properties. *Adv Energy Mater* **10**, (2020).
- 311 14. Liu, J. *et al.* Fast Response Organic Tandem Photodetector for Visible and Near-Infrared  
312 Digital Optical Communications. *Small* **17**, (2021).
- 313 15. Huang, J. *et al.* A High-Performance Solution-Processed Organic Photodetector for  
314 Near-Infrared Sensing. *Advanced Materials* **32**, (2020).
- 315 16. Kielar, M., Dhez, O., Pecastaings, G., Curutchet, A. & Hirsch, L. Long-Term Stable  
316 Organic Photodetectors with Ultra Low Dark Currents for High Detectivity Applications.  
317 *Sci Rep* **6**, (2016).
- 318 17. Tang, Z. *et al.* Polymer:Fullerene Bimolecular Crystals for Near-Infrared Spectroscopic  
319 Photodetectors. *Advanced Materials* **29**, (2017).
- 320 18. Strobel, N. *et al.* Color-Selective Printed Organic Photodiodes for Filterless  
321 Multichannel Visible Light Communication. *Advanced Materials* **32**, (2020).
- 322 19. Zhang, H. *et al.* Transparent organic photodetector using a near-infrared absorbing  
323 cyanine dye. *Sci Rep* **5**, (2015).
- 324 20. Nie, R. *et al.* Highly Sensitive and Broadband Organic Photodetectors with Fast Speed  
325 Gain and Large Linear Dynamic Range at Low Forward Bias. *Small* **13**, (2017).
- 326 21. Kim, I. K. *et al.* High-Performance, Solution-Processed Non-polymeric Organic  
327 Photodiodes. *Adv Opt Mater* **3**, 50–56 (2015).
- 328 22. Zhou, X., Yang, D. & Ma, D. Extremely Low Dark Current, High Responsivity, All-  
329 Polymer Photodetectors with Spectral Response from 300 nm to 1000 nm. *Adv Opt*  
330 *Mater* **3**, 1570–1576 (2015).
- 331 23. Yang, W. *et al.* Mitigating Dark Current for High-Performance Near-Infrared Organic  
332 Photodiodes via Charge Blocking and Defect Passivation. *ACS Appl Mater Interfaces*  
333 **13**, 16766–16774 (2021).

- 334 24. Kang, J. *et al.* Enhanced Static and Dynamic Properties of Highly Miscible Fullerene-  
335 Free Green-Selective Organic Photodetectors. *ACS Appl Mater Interfaces* (2021)  
336 doi:10.1021/acsami.1c02357.
- 337 25. Babics, M. *et al.* Non-fullerene-based organic photodetectors for infrared  
338 communication. *J Mater Chem C Mater* **9**, 2375–2380 (2021).
- 339 26. Wei, Y. *et al.* Self-Powered Organic Photodetectors with High Detectivity for Near  
340 Infrared Light Detection Enabled by Dark Current Reduction. *Adv Funct Mater* **31**,  
341 (2021).
- 342 27. Eun, H. J. *et al.* Effective Dark Current Suppression for High-Detectivity Organic Near-  
343 Infrared Photodetectors Using a Non-Fullerene Acceptor. *Cite This: ACS Appl. Mater.*  
344 *Interfaces* **13**, (2021).
- 345
